# Supplementary material
Source: HighWire-hosted journal article supplement (doi:10.1101/rna.079521.122)
Supplement: Supplemental_Figure_Legends.docx [file Supplemental_Figure_Legends.docx]

**Supplemental Figure Legends**

**Supplemental Figure 1:** Sequence and predicted ΔG of the oligonucleotides used in the adenylation and ligation reactions.

**Supplemental Figure 2:** *(A)* Adenylation of a 5ʹ phosphorylated DNA oligonucleotide in the indicated solvents. *(B)* Q-TOF LC/MS results of a 5ʹ phosphorylated DNA oligonucleotide (35-nt DNA 1) adenylated either in water, pure formamide, or 95% formamide showing the presence of a mass of the adenylated product +28 when the reaction is performed in pure formamide.

**Supplemental Figure 3:** High-resolution Mass Spectrometry to identify the HPLC peaks in **(Figure 5)**. *(A)* Results from the ~7-minute HPLC peak. *(B)* Results from the ~9.5-minute HPLC peak. *(C)* Results from the ~10.5-minute HPLC peak.

**Supplemental Figure 4:** 1H and 31P NMR of adenosine 5ʹ-phosphorimidazolide (ImpA) in DMSO-*d6.*
